# Supplementary material for: Protein-resistant surface based on zwitterion-functionalized nanoparticles for marine antifouling applications
Source: Royal Society of Chemistry journal article supplement (doi:10.1039/c9nj04266k), 2020-01-01
Supplement: c9nj04266k1.pdf [file c9nj04266k1.pdf]

Supplementary Materials for

# Protein-Resistant Surface Based on Zwitterion-Functionalized Nanoparticles for Marine Antifouling Applications

By *Ding Sun, Peiyun Li, Xiong Li, Xuefen Wang\**

State Key Laboratory for Modification of Chemical Fibers and Polymer Materials,  
College of Materials Science and Engineering, Donghua University, Shanghai,  
201620, P.R. China

\*Corresponding author: [wangxf@dhu.edu.cn](mailto:wangxf@dhu.edu.cn)

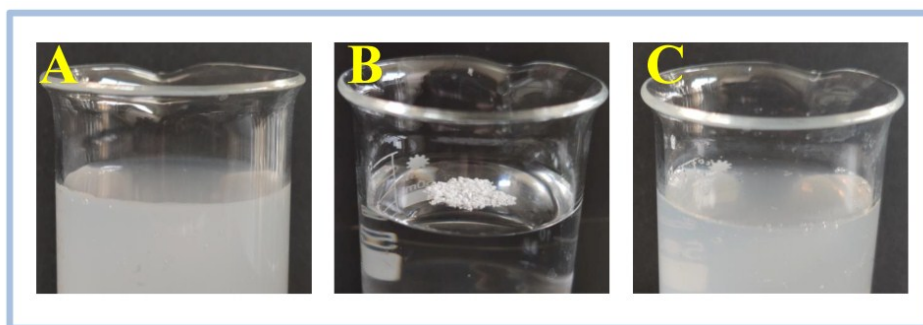

**Fig. S1** Photographic images of surface wettability of silica (A), VTMO@silica (B), and PSBMA@VTMO@silica hybrid nanoparticles (C).

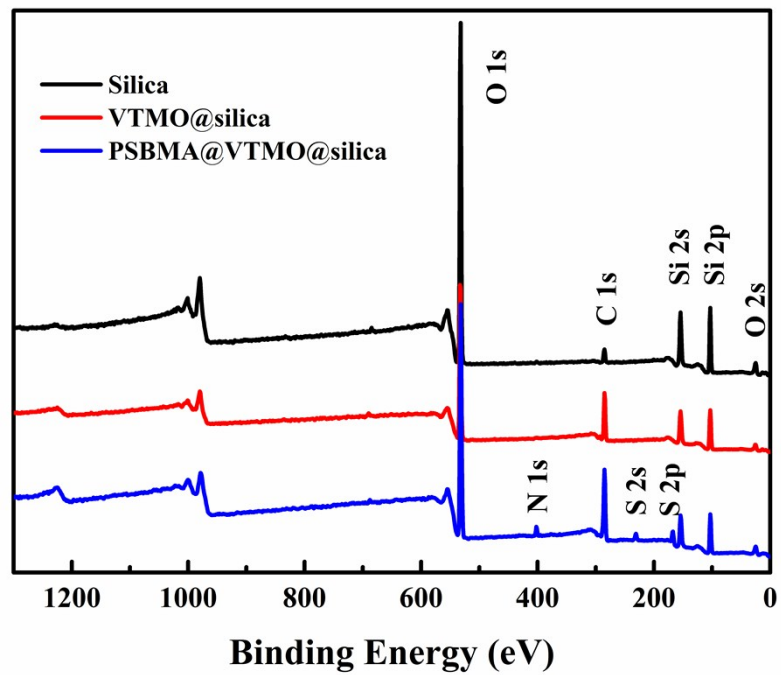

**Fig. S2** XPS spectra of silica, VTMO@silica and PSBMA@VTMO@silica.

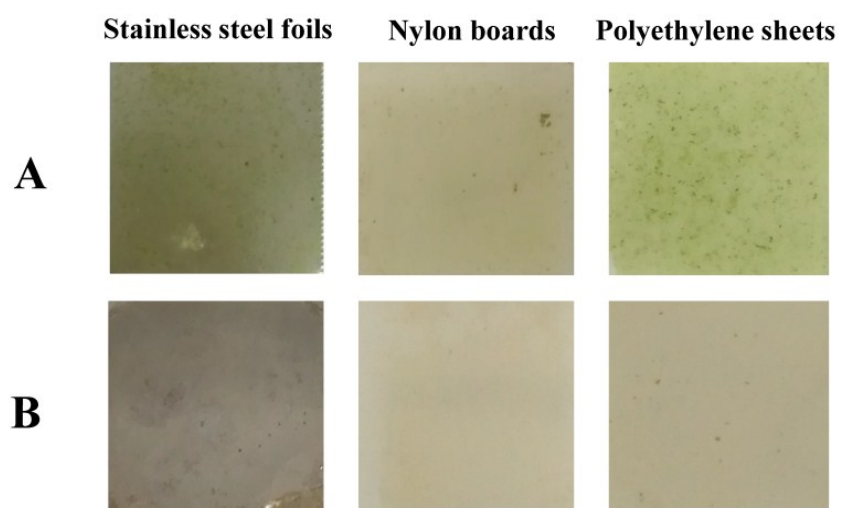

**Fig. S3** Representative digital images of Chlorococcoid attached on various surfaces before (A) and after (B) PSBMA@VTMO@silica/TA-PEG nanocomposite coating formation.

**Table S1** Classification of adhesion test results.

| Classification | Percent area removed | Surface of cross-cut area from which flaking has occurred for six parallel cuts and adhesion range by percent |
|----------------|----------------------|---------------------------------------------------------------------------------------------------------------|
| 5B             | 0% None              | 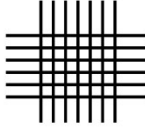                            |
| 4B             | Less than 5%         |                             |
| 3B             | 5%-15%               |                             |
| 2B             | 15%-35%              |                             |
| 1B             | 35%-65%              |                            |
| 0B             | Greater than 65%     |                           |

**Table S2** Water contact angle (WCA) evolution of the PSBMA/TA-PEG coating after different abrasion cycles.

| Sample               | Sandpaper abrasion test |         |
|----------------------|-------------------------|---------|
|                      | Cycles                  | WCA(° ) |
| PSBMA/TA-PEG coating | 0                       | 39.2    |
|                      | 4                       | 45.1    |
|                      | 8                       | 52.8    |
|                      | 12                      | 61.4    |
